# Supplementary material for: The Bacterial Response Regulator ArcA Uses a Diverse Binding Site Architecture to Regulate Carbon Oxidation Globally
Source: PLoS Genet. 2013 Oct 17;9(10):e1003839. doi: 10.1371/journal.pgen.1003839 (PMC3798270; doi:10.1371/journal.pgen.1003839)
Supplement: Table S9 — Dehydrogenases that are directly or indirectly regulated by ArcA. (XLS) [file pgen.1003839.s013.xls]

## Sheet: Sheet1
Table S9. Dehydrogenases that are directly or indirectly regulated by ArcA
Gene	genes encoding dehydrogenase
Dehydrogenase	Annotated in EcoCyc [7].
ArcA binding region	Presence of upstream ChIP peak
Fold change	fold change: expression in ΔarcA / expression in wt. See Table S5 for expression data
cofactor	Annotated in EcoCyc [7].
Gene	Dehydrogenase	ArcA binding region	Fold change	cofactor
betB	betaine aldehyde dehydrogenase	yes	8.8	NAD
mdh	malate dehydrogenase	yes	8.8	NAD
lldD	lactate dehydrogenase	yes	8.7	FMN
lpd	lipoamide dehydrogenase	yes	6.1	NAD
fdoGHI	formate dehydrogenase-O	yes	6.1	MQ
fadJ	FadJ component of anaerobic fatty acid oxidation complex (3-hydroxyacyl-CoA dehydrogenase)	yes	5.7	NAD
icdA	isocitrate dehydrogenase	yes	4.9	NADP
maeB	malate dehydrogenase (oxaloacetate-decarboxylating)	yes	4.9	NADP
aldA	aldehyde dehydrogenase A, NAD-linked	yes	36.1	NAD
putA	fused PutA DNA-binding transcriptional repressor / proline dehydrogenase / 1-pyrroline-5-carboxylate dehydrogenase	yes	30.8	NAD
aceEF-lpdA	pyruvate dehydrogenase	yes	3.8	NAD
betA	choline dehydrogenase	yes	3.2	FAD
astD	aldehyde dehydrogenase	yes	3.1	NAD
yeiQ	putative NADH dehydrogenase	yes	3.1	NAD
fadB	fatty acid oxidation complex, alpha component (3-hydroxyacyl-CoA dehydrogenase)	yes	27.2	NAD
sucAB-lpdA	2-oxoglutarate dehydrogenase complex	yes	23.5	NAD
sthA	pyridine nucleotide transhydrogenase (soluble)	yes	20.2	NAD(P)
gcd	glucose dehydrogenase	yes	20.1	PQQ
nuoA-M	NADH:ubiquinone oxidoreductase I (NADH dehydrogenase I)	yes	2.7	NAD
fadE	acyl coA dehydrogenase	yes	17.1	FAD
sdhCDAB	succinate dehydrogenase	yes	152.4	FAD
glpD	glycerol 3-phosphate dehydrogenase	yes	1.9	UQ
mhpF	acetaldehyde dehydrogenase 2	yes	1.8	NAD
feaB	phenylacetaldehyde dehydrogenase	yes	1.4	NAD
paaH	3-hydroxyadipyl-CoA dehydrogenase (NAD+)	yes	1.1b	NAD
pntA	pyridine nucleotide transhydrogenase (membrane-bound)	yes	1	NAD(P)
ndh	NADH:ubiquinone oxidoreductase II (NADH dehydrogenase II)	yes	-1.7	NAD
gapAa	glyceraldehyde 3-phosphate dehydrogenase-A complex	yes	-1.1	NAD
hcaB	3-(cis-5,6-dihydroxycyclohexa-1,3-dien-1-yl)propanoate dehydrogenase	yes	-1	NAD
paaZ	oxepin-CoA hydrolase/3-oxo-5,6-dehydrosuberyl-CoA semialdehyde dehydrogenase	yes	1.6	NADP
dadAX	D-amino acid dehydrogenase	no	18.7	Q
gdhA	glutamate dehydrogenase	no	2.3	NADP
ykgF	predicted amino acid dehydrogenase	no	3	NAD(P)
dld	D-lactate dehydrogenase	no	2	FAD
ydcW	γ-aminobutyraldehyde dehydrogenase	no	2.3	NAD
tdh	threonine dehydrogenase	no	2.1	NAD
puuC	γ-glutamyl-γ-aminobutyraldehyde dehydrogenase	no	6.4	NAD
aArcA binding region may correspond to the divergent, ArcA repressed msrB gene.
bRepressed by ArcA when supplemented with phenylacetic acid
